# Supplementary material
Source: PubMed Central journal article supplement (PMC6957285)
Supplement: ehp-127-127005-s001.pdf [file ehp-127-127005-s001.pdf]

**Note to readers with disabilities:** *EHP* strives to ensure that all journal content is accessible to all readers. However, some figures and Supplemental Material published in *EHP* articles may not conform to [508 standards](#) due to the complexity of the information being presented. If you need assistance accessing journal content, please contact [ehp508@niehs.nih.gov](mailto:ehp508@niehs.nih.gov). Our staff will work with you to assess and meet your accessibility needs within 3 working days.

### **Supplemental Material**

#### **Profiles of Emerging and Legacy Per-/Polyfluoroalkyl Substances in Matched Serum and Semen Samples: New Implications for Human Semen Quality**

Yitao Pan, Qianqian Cui, Jinghua Wang, Nan Sheng, Jun Jing, Bing Yao, and Jiayin Dai

#### **Table of Contents**

##### **Competing financial interests**

##### **Standards and reagents**

##### **Sample extraction**

##### **Instrument analysis**

**Table S1.** LC-MS/MS instrument parameters for the quantification of target analytes.

**Table S2.** Limits of quantitation (LOQs), matrix spike recoveries, and matrix effects (means  $\pm$  SD, %) of target PFASs ( $n = 5$ ).

**Table S3.** Pearson's correlations between ln-transformed PFAS concentrations in serum ( $n = 664$ ).

**Table S4.** Pearson's correlations between ln-transformed PFAS concentrations in semen ( $n = 664$ ).

**Table S5.** Estimated means (95% confidence intervals) for PFAS concentration ratios (semen versus serum) with and without imputation.

**Table S6.** Estimated changes in semen quality parameters associated with both semen- and serum-based PFAS levels ( $n = 664$ ).

**Table S7.** Regression coefficients (95% confidence intervals) in semen quality parameters across semen-based PFAS quartiles ( $n = 664$ ).

**Table S8.** Regression coefficients (95% confidence intervals) in semen quality parameters across serum-based PFAS quartiles ( $n = 664$ ).

**Figure S1.** Regression coefficients and 95% confidence intervals for changes in semen parameters across PFAS quartiles ( $n = 664$ ). First quartile (Q1) was used as a reference group. Models were adjusted for age, BMI, BMI<sup>2</sup>, smoking, alcohol intake, and abstinence time. Semen volume was ln-transformed, sperm concentration and total sperm count were cubic-root transformed. Curvilinear velocity (VCL), straight-line velocity (VSL), and sperm morphology were included in the regressions untransformed. FDR-adjusted  $p$ -values were used for trends and are shown in blue (semen PFAS quartiles) and black (serum PFAS quartiles). See Table S7 and S8 for corresponding numerical data.

**Competing financial interests:** The authors declare no conflicts of interest.

### **Standards and reagents**

The 16 target PFASs included perfluorobutanoate (PFBA), perfluoropentanoate (PFPeA), perfluorohexanoate (PFHxA), perfluoroheptanoate (PFHpA), perfluorooctanoate (PFOA), perfluorononanoate (PFNA), perfluorodecanoate (PFDA), perfluoroundecanoate (PFUnDA), perfluorododecanoate (PFDoDA), perfluorotridecanoate (PFTriDA), perfluorotetradecanoate (PFTeDA), perfluorobutane sulfonate (PFBS), perfluorohexane sulfonate (PFHxS), perfluorooctane sulfonate (PFOS), and chlorinated polyfluorinated ether sulfonates (6:2 and 8:2 Cl-PFESA). All native standards and their corresponding mass-labelled internal standards were purchased from Wellington Laboratories (Guelph, ON, Canada).

Tetra-*n*-butyl ammonium hydrogen sulfate (TBAS), ammonium acetate, sodium carbonate, and sodium bicarbonate were obtained from Sigma (St. Louis, MO, USA). LC-MS grade water and methanol and LC grade methyl *tert*-butyl ether (MTBE) were obtained from Fisher Scientific (Pittsburgh, PA, USA). Newborn bovine serum was purchased from Gibco Life Technologies (Paisley, UK). Standard reference material (SRM1957, organic contaminants in non-fortified human serum) was purchased from the National Institute of Standards and Technology (NIST, USA).

### **Sample extraction**

Serum (200  $\mu$ L) and semen (0.4–1.0 mL, depending on volume remaining after routine semen analyses) samples were spiked with 0.5 ng of mass-labelled extraction standard, 1 mL of tetra-*n*-butylammonium hydrogen sulfate solution (TBAS, 0.5 M), 2 mL of NaHCO<sub>3</sub>/Na<sub>2</sub>CO<sub>3</sub> buffer solution (pH = 10), and 4 mL of methyl *tert*-butyl ether (MTBE). After shaking and centrifugation, the supernatant was collected by a polypropylene Pasteur pipette, with the remaining residue extracted twice more with 4 mL of MTBE. All three extracts were combined and evaporated to dryness under nitrogen at 40 °C and reconstituted with 200  $\mu$ L of methanol, with 0.5 ng of additional mass-labelled injection standard (containing <sup>13</sup>C<sub>3</sub>-PFBA, <sup>13</sup>C<sub>2</sub>-PFOA, <sup>13</sup>C<sub>4</sub>-PFOS, and <sup>13</sup>C<sub>2</sub>-PFDA, Table S1) then added before LC-MS/MS analysis.

### **Instrument analysis**

An Acquity UPLC coupled to a Xevo TQ-S triple quadrupole mass spectrometer (Waters, Milford, MA, USA) was used to quantify target PFASs. Details of chromatographic column and instrument parameters are presented in Table S1.

Table S1. LC-MS/MS instrument parameters for the quantification of target analytes.

|                                                |                                                                                                            |                 |                    |                                      |                                      |  |
|------------------------------------------------|------------------------------------------------------------------------------------------------------------|-----------------|--------------------|--------------------------------------|--------------------------------------|--|
| Instrument                                     | Acquity I-Class UPLC coupled to a Xevo TQ-S triple quadrupole mass spectrometer (Waters, Milford, MA, USA) |                 |                    |                                      |                                      |  |
| Analytical column                              | Acquity BEH C18 column (100 mm × 2.1 mm, 1.7 μm, Waters, MA, USA)                                          |                 |                    |                                      |                                      |  |
| Trap column                                    | C18 column (50 mm × 2.1 mm, 3.0 μm, Waters, MA, USA)                                                       |                 |                    |                                      |                                      |  |
| Column temperature                             | 40 °C                                                                                                      |                 |                    |                                      |                                      |  |
| Injection volume                               | 2 μL                                                                                                       |                 |                    |                                      |                                      |  |
| Mobile phase                                   | 2 mM ammonium acetate in water (A) and methanol (B)                                                        |                 |                    |                                      |                                      |  |
| Gradient                                       |                                                                                                            | Time (min)      | Flow rate (mL/min) | A (%)                                | B (%)                                |  |
|                                                |                                                                                                            | 0.0             | 0.30               | 90                                   | 10                                   |  |
|                                                |                                                                                                            | 1.0             | 0.30               | 80                                   | 20                                   |  |
|                                                |                                                                                                            | 4.0             | 0.30               | 10                                   | 90                                   |  |
|                                                |                                                                                                            | 6.0             | 0.30               | 10                                   | 90                                   |  |
|                                                |                                                                                                            | 6.1             | 0.30               | 90                                   | 10                                   |  |
|                                                |                                                                                                            | 9.0             | 0.30               | 90                                   | 10                                   |  |
| Multiple reaction monitoring (MRM) transitions | Compound                                                                                                   | Ion transitions | CV (V)             | CE (V)                               | Internal standard                    |  |
|                                                | PFBA                                                                                                       | 213→169*        | 30                 | 11                                   | <sup>13</sup> C <sub>4</sub> -PFBA   |  |
|                                                | PFPeA                                                                                                      | 263→219*        | 2                  | 8                                    | <sup>13</sup> C <sub>5</sub> -PFPeA  |  |
|                                                | PFHxA                                                                                                      | 313→269*        | 14                 | 10                                   | <sup>13</sup> C <sub>5</sub> -PFHxA  |  |
|                                                |                                                                                                            | 313→119         | 14                 | 15                                   |                                      |  |
|                                                | PFHpA                                                                                                      | 363→319*        | 30                 | 10                                   | <sup>13</sup> C <sub>4</sub> -PFHpA  |  |
|                                                |                                                                                                            | 363→169         | 30                 | 19                                   |                                      |  |
|                                                | PFOA                                                                                                       | 413→369*        | 30                 | 10                                   | <sup>13</sup> C <sub>8</sub> -PFOA   |  |
|                                                |                                                                                                            | 413→169         | 30                 | 18                                   |                                      |  |
|                                                | PFNA                                                                                                       | 463→419*        | 28                 | 1                                    | <sup>13</sup> C <sub>9</sub> -PFNA   |  |
|                                                |                                                                                                            | 463→169         | 32                 | 20                                   |                                      |  |
|                                                | PFDA                                                                                                       | 513→469*        | 12                 | 10                                   | <sup>13</sup> C <sub>6</sub> -PFDA   |  |
|                                                |                                                                                                            | 513→219         | 12                 | 18                                   |                                      |  |
|                                                | PFUnDA                                                                                                     | 563→519*        | 30                 | 10                                   | <sup>13</sup> C <sub>7</sub> -PFUnDA |  |
|                                                |                                                                                                            | 563→319         | 30                 | 17                                   |                                      |  |
| PFDoDA                                         | 613→569*                                                                                                   | 22              | 10                 | <sup>13</sup> C <sub>2</sub> -PFDoDA |                                      |  |
|                                                | 613→169                                                                                                    | 10              | 22                 |                                      |                                      |  |

|                                                                                                               |                          |    |    |                                       |
|---------------------------------------------------------------------------------------------------------------|--------------------------|----|----|---------------------------------------|
| PFTriDA                                                                                                       | 663→619*                 | 10 | 10 | <sup>13</sup> C <sub>2</sub> - PFTeDA |
|                                                                                                               | 663→169                  | 10 | 26 |                                       |
| PFTeDA                                                                                                        | 713→669*                 | 8  | 15 | <sup>13</sup> C <sub>2</sub> - PFTeDA |
|                                                                                                               | 713→169                  | 10 | 22 |                                       |
| PFBS                                                                                                          | 299→80*                  | 40 | 30 | <sup>13</sup> C <sub>3</sub> -PFBS    |
|                                                                                                               | 299→99                   | 40 | 28 |                                       |
| PFHxS                                                                                                         | 399→99*                  | 30 | 31 | <sup>13</sup> C <sub>3</sub> -PFHxS   |
|                                                                                                               | 399→80                   | 45 | 33 |                                       |
| PFOS                                                                                                          | 499→99*                  | 30 | 39 | <sup>13</sup> C <sub>8</sub> -PFOS    |
|                                                                                                               | 499→80                   | 30 | 37 |                                       |
| 6:2 Cl-PFESA                                                                                                  | 531→351*                 | 12 | 24 | <sup>13</sup> C <sub>8</sub> -PFOS    |
|                                                                                                               | 531→83                   | 12 | 22 |                                       |
| 8:2 Cl-PFESA                                                                                                  | 631→451*                 | 2  | 28 | <sup>13</sup> C <sub>8</sub> -PFOS    |
|                                                                                                               | 631→83                   | 20 | 35 |                                       |
| <i>Mass-labeled extraction standards</i>                                                                      |                          |    |    |                                       |
| <sup>13</sup> C <sub>4</sub> -PFBA                                                                            | 217→172                  | 30 | 11 |                                       |
| <sup>13</sup> C <sub>5</sub> -PFPeA                                                                           | 268→223                  | 2  | 8  |                                       |
| <sup>13</sup> C <sub>5</sub> -PFHxA                                                                           | 318→273                  | 14 | 10 |                                       |
| <sup>13</sup> C <sub>4</sub> -PFHpA                                                                           | 367→322                  | 30 | 10 |                                       |
| <sup>13</sup> C <sub>8</sub> -PFOA                                                                            | 421→376                  | 30 | 10 |                                       |
| <sup>13</sup> C <sub>9</sub> -PFNA                                                                            | 472→427                  | 30 | 10 |                                       |
| <sup>13</sup> C <sub>6</sub> -PFDA                                                                            | 519→474                  | 12 | 10 |                                       |
| <sup>13</sup> C <sub>7</sub> -PFUnDA                                                                          | 570→525                  | 30 | 10 |                                       |
| <sup>13</sup> C <sub>2</sub> -PFDoDA                                                                          | 615→570                  | 22 | 10 |                                       |
| <sup>13</sup> C <sub>2</sub> -PFTeDA                                                                          | 715→670                  | 10 | 14 |                                       |
| <sup>13</sup> C <sub>3</sub> -PFBS                                                                            | 302→99                   | 10 | 14 |                                       |
| <sup>13</sup> C <sub>3</sub> -PFHxS                                                                           | 402→99                   | 45 | 30 |                                       |
| <sup>13</sup> C <sub>8</sub> -PFOS                                                                            | 507→80                   | 20 | 34 |                                       |
| <i>Mass-labeled injection standards</i>                                                                       |                          |    |    |                                       |
| <sup>13</sup> C <sub>3</sub> -PFBA                                                                            | 216→172                  | 30 | 11 |                                       |
| <sup>13</sup> C <sub>2</sub> -PFOA                                                                            | 415→370                  | 30 | 10 |                                       |
| <sup>13</sup> C <sub>2</sub> -PFDA                                                                            | 515→470                  | 12 | 10 |                                       |
| <sup>13</sup> C <sub>4</sub> -PFOS                                                                            | 503→80                   | 20 | 34 |                                       |
| (*) represents quantitative ion transition of corresponding analyte<br>CV: cone voltage; CE: collision energy |                          |    |    |                                       |
| Other mass                                                                                                    | <b>Xevo TQ-S, Waters</b> |    |    |                                       |

|            |                                                                                                                                                        |
|------------|--------------------------------------------------------------------------------------------------------------------------------------------------------|
| parameters | Capillary voltage, -0.5 kV<br>Source temperature, 150 °C<br>Desolvation temperature, 450 °C<br>Desolvation gas flow, 850 L/h<br>Cone gas flow, 150 L/h |
|------------|--------------------------------------------------------------------------------------------------------------------------------------------------------|

Table S2. Limits of quantitation (LOQs), matrix spike recoveries, and matrix effects (means  $\pm$  SD, %) of target PFASs ( $n = 5$ ).

| Analyte      | Serum   |                    |                 |                 | Semen       |                    |                 |                 |
|--------------|---------|--------------------|-----------------|-----------------|-------------|--------------------|-----------------|-----------------|
|              | LOQ     | Spike recovery (%) |                 | Matrix effect   | LOQ         | Spike recovery (%) |                 | Matrix effect   |
|              | (ng/mL) | 0.1 ppb            | 1 ppb           | (%)             | (ng/mL)     | 0.1 ppb            | 1 ppb           | (%)             |
| PFBA         | 0.100   | 89.2 $\pm$ 6.2     | 99.0 $\pm$ 2.6  | 96.3 $\pm$ 2.1  | 0.030–0.075 | 86.3 $\pm$ 9.0     | 92.2 $\pm$ 1.8  | 91.9 $\pm$ 2.4  |
| PFPeA        | 0.050   | 96.5 $\pm$ 1.9     | 105.1 $\pm$ 5.0 | 99.0 $\pm$ 2.4  | 0.020–0.050 | 93.1 $\pm$ 4.3     | 105.5 $\pm$ 2.0 | 100.1 $\pm$ 1.6 |
| PFHxA        | 0.200   | 87.3 $\pm$ 4.0     | 107.5 $\pm$ 4.1 | 100.1 $\pm$ 1.8 | 0.040–0.100 | 84.2 $\pm$ 5.9     | 100.7 $\pm$ 2.1 | 95.2 $\pm$ 2.2  |
| PFHpA        | 0.020   | 96.1 $\pm$ 2.6     | 109.2 $\pm$ 5.1 | 100.4 $\pm$ 3.2 | 0.004–0.010 | 101.6 $\pm$ 3.8    | 112.3 $\pm$ 2.5 | 104.3 $\pm$ 2.6 |
| PFOA         | 0.020   | 90.8 $\pm$ 4.4     | 102.7 $\pm$ 5.6 | 98.3 $\pm$ 2.5  | 0.004–0.010 | 97.4 $\pm$ 9.6     | 106.1 $\pm$ 3.4 | 90.6 $\pm$ 6.1  |
| PFNA         | 0.020   | 92.4 $\pm$ 4.1     | 105.2 $\pm$ 4.2 | 96.1 $\pm$ 2.1  | 0.004–0.010 | 105.5 $\pm$ 4.3    | 103.7 $\pm$ 3.4 | 92.2 $\pm$ 1.6  |
| PFDA         | 0.020   | 94.6 $\pm$ 4.2     | 106.8 $\pm$ 5.4 | 97.7 $\pm$ 2.8  | 0.004–0.010 | 96.1 $\pm$ 8.2     | 108.9 $\pm$ 5.2 | 99.6 $\pm$ 2.4  |
| PFUnDA       | 0.010   | 96.2 $\pm$ 1.7     | 106.2 $\pm$ 4.7 | 100.2 $\pm$ 1.9 | 0.002–0.005 | 110.0 $\pm$ 5.0    | 106.4 $\pm$ 2.3 | 100.5 $\pm$ 4.0 |
| PFDoDA       | 0.010   | 92.8 $\pm$ 3.5     | 107.7 $\pm$ 7.0 | 101.0 $\pm$ 2.4 | 0.002–0.005 | 101.2 $\pm$ 6.1    | 112.2 $\pm$ 1.5 | 103.1 $\pm$ 1.8 |
| PFTriDA      | 0.010   | 97.1 $\pm$ 2.1     | 102.2 $\pm$ 5.2 | 99.7 $\pm$ 2.2  | 0.002–0.005 | 104.3 $\pm$ 7.8    | 96.9 $\pm$ 3.2  | 97.6 $\pm$ 1.4  |
| PFTeDA       | 0.010   | 101.0 $\pm$ 5.5    | 107.6 $\pm$ 5.8 | 100.9 $\pm$ 2.6 | 0.002–0.005 | 115.1 $\pm$ 2.5    | 106.1 $\pm$ 2.0 | 104.7 $\pm$ 3.5 |
| PFBS         | 0.010   | 94.5 $\pm$ 3.2     | 106.1 $\pm$ 4.1 | 99.2 $\pm$ 1.7  | 0.004–0.010 | 106.7 $\pm$ 3.9    | 104.2 $\pm$ 3.1 | 97.2 $\pm$ 1.2  |
| PFHxS        | 0.020   | 92.5 $\pm$ 3.0     | 104.5 $\pm$ 4.0 | 97.1 $\pm$ 2.2  | 0.008–0.020 | 98.3 $\pm$ 6.2     | 106.5 $\pm$ 2.4 | 99.8 $\pm$ 2.8  |
| PFOS         | 0.020   | 93.2 $\pm$ 3.2     | 103.3 $\pm$ 6.3 | 99.5 $\pm$ 1.5  | 0.004–0.010 | 109.6 $\pm$ 5.0    | 105.2 $\pm$ 4.4 | 99.1 $\pm$ 5.3  |
| 6:2 Cl-PFESA | 0.010   | 97.6 $\pm$ 4.0     | 110.8 $\pm$ 5.5 | 102.3 $\pm$ 3.4 | 0.002–0.005 | 83.9 $\pm$ 4.4     | 91.3 $\pm$ 4.8  | 79.0 $\pm$ 8.5  |
| 8:2 Cl-PFESA | 0.010   | 92.2 $\pm$ 3.7     | 103.2 $\pm$ 6.4 | 98.3 $\pm$ 3.6  | 0.002–0.005 | 100.9 $\pm$ 5.1    | 104.5 $\pm$ 3.6 | 99.2 $\pm$ 3.4  |

Three criteria were used to evaluate LOQs: (1) Concentration resulting in a signal-to-noise ratio at or greater than 10 in matrices; (2) Lowest concentration of standard in the calibration curve with measured concentrations within  $\pm$  20% of its theoretical value; and, (3) Concentration factor. LOQs for semen were reported as a range because the concentration factor varied among semen samples (depending on remaining volume after routine semen analyses).

Table S3. Pearson's correlations between ln-transformed PFAS concentrations in serum ( $n = 664$ ).

|              | PFOA  | PFNA  | PFDA  | PFUnDA | PFDoDA | PFTriDA | PFHxS | PFOS  | 6:2 Cl-PFESA | 8:2 Cl-PFESA |
|--------------|-------|-------|-------|--------|--------|---------|-------|-------|--------------|--------------|
| PFOA         | 1     |       |       |        |        |         |       |       |              |              |
| PFNA         | 0.570 | 1     |       |        |        |         |       |       |              |              |
| PFDA         | 0.428 | 0.825 | 1     |        |        |         |       |       |              |              |
| PFUnDA       | 0.440 | 0.910 | 0.851 | 1      |        |         |       |       |              |              |
| PFDoDA       | 0.413 | 0.821 | 0.768 | 0.908  | 1      |         |       |       |              |              |
| PFTriDA      | 0.404 | 0.810 | 0.731 | 0.906  | 0.890  | 1       |       |       |              |              |
| PFHxS        | 0.340 | 0.361 | 0.327 | 0.341  | 0.282  | 0.348   | 1     |       |              |              |
| PFOS         | 0.429 | 0.740 | 0.688 | 0.760  | 0.675  | 0.686   | 0.548 | 1     |              |              |
| 6:2 Cl-PFESA | 0.593 | 0.752 | 0.702 | 0.762  | 0.700  | 0.652   | 0.317 | 0.730 | 1            |              |
| 8:2 Cl-PFESA | 0.445 | 0.665 | 0.659 | 0.741  | 0.704  | 0.649   | 0.279 | 0.674 | 0.844        | 1            |

Censored likelihood multiple imputation was used to impute PFAS concentrations below the LOQ.

$p \leq 0.001$  in all Pearson's correlations



Table S4. Pearson's correlations between ln-transformed PFAS concentrations in semen ( $n = 664$ ).

|              | PFOA  | PFNA  | PFDA  | PFUnDA | PFDoDA | PFTriDA | PFHxS | PFOS  | 6:2 Cl-PFESA | 8:2 Cl-PFESA |
|--------------|-------|-------|-------|--------|--------|---------|-------|-------|--------------|--------------|
| PFOA         | 1     |       |       |        |        |         |       |       |              |              |
| PFNA         | 0.732 | 1     |       |        |        |         |       |       |              |              |
| PFDA         | 0.599 | 0.869 | 1     |        |        |         |       |       |              |              |
| PFUnDA       | 0.473 | 0.749 | 0.864 | 1      |        |         |       |       |              |              |
| PFDoDA       | 0.458 | 0.619 | 0.706 | 0.71   | 1      |         |       |       |              |              |
| PFTriDA      | 0.371 | 0.594 | 0.704 | 0.814  | 0.7    | 1       |       |       |              |              |
| PFHxS        | 0.542 | 0.536 | 0.493 | 0.425  | 0.406  | 0.371   | 1     |       |              |              |
| PFOS         | 0.588 | 0.757 | 0.798 | 0.755  | 0.609  | 0.631   | 0.573 | 1     |              |              |
| 6:2 Cl-PFESA | 0.696 | 0.761 | 0.795 | 0.699  | 0.614  | 0.575   | 0.506 | 0.785 | 1            |              |
| 8:2 Cl-PFESA | 0.549 | 0.605 | 0.693 | 0.642  | 0.672  | 0.567   | 0.454 | 0.653 | 0.780        | 1            |

Censored likelihood multiple imputation was used to impute PFAS concentrations below the LOQ.

$p \leq 0.001$  in all Pearson's correlations

Table S5. Estimated means (95% confidence intervals) for PFAS concentration ratios (semen versus serum) with and without imputation.

|                      | With imputation <sup>a</sup> |          | Without imputation <sup>b</sup> |          |
|----------------------|------------------------------|----------|---------------------------------|----------|
|                      | Mean                         | <i>n</i> | Mean                            | <i>n</i> |
| PFOA                 | 3.07 (2.93, 3.20)            | 664      | 3.07 (2.93, 3.20)               | 664      |
| PFNA                 | 1.88 (1.77, 1.98)            | 664      | 2.07 (1.96, 2.18)               | 557      |
| PFDA                 | 2.01 (1.85, 2.17)            | 664      | 2.09 (1.95, 2.22)               | 554      |
| PFU <sub>n</sub> DA  | 2.35 (2.25, 2.45)            | 664      | 2.57 (2.47, 2.68)               | 557      |
| PFD <sub>o</sub> DA  | 5.07 (4.59, 5.54)            | 664      | 6.45 (5.48, 7.41)               | 192      |
| PFT <sub>ri</sub> DA | 8.13 (7.48, 8.79)            | 664      | 8.39 (7.95, 8.82)               | 506      |
| PFH <sub>x</sub> S   | 2.18 (1.99, 2.36)            | 664      | 4.03 (3.56, 4.51)               | 204      |
| PFOS                 | 1.33 (1.26, 1.40)            | 664      | 1.37 (1.30, 1.44)               | 638      |
| 6:2 Cl-PFESA         | 1.31 (1.22, 1.39)            | 664      | 1.31 (1.22, 1.39)               | 664      |
| 8:2 Cl-PFESA         | 3.90 (3.47, 4.33)            | 664      | 3.94 (3.23, 4.65)               | 201      |

<sup>a</sup> Censored likelihood multiple imputation was used to impute PFAS concentrations below the LOQ. All samples were included in analysis.

<sup>b</sup> Only paired serum-semen samples with PFAS levels both greater than the corresponding LOQs were included in analysis

Table S6. Estimated changes in semen quality parameters associated with both semen- and serum-based PFAS levels ( $n = 664$ ).

| Outcome <sup>a</sup>                     | matrix | PFOA                       |      | PFNA                       |      | PFDA                       |      | PFUnDA                     |      | PFOS                       |      | 6:2 Cl-PFESA               |      |
|------------------------------------------|--------|----------------------------|------|----------------------------|------|----------------------------|------|----------------------------|------|----------------------------|------|----------------------------|------|
|                                          |        | $\beta$ (95% CI)           | $p$  |
| Semen volume (mL) <sup>b</sup>           | semen  | -0.028<br>(-0.070, 0.013)  | 0.4  | -0.019<br>(-0.052, 0.015)  | 0.5  | -0.010<br>(-0.046, 0.025)  | 0.8  | -0.032<br>(-0.064, 0.000)  | 0.2  | -0.006<br>(-0.038, 0.025)  | 0.9  | -0.003<br>(-0.034, 0.029)  | 1.0  |
|                                          | serum  | 0.025<br>(-0.029, 0.079)   | 0.6  | -0.013<br>(-0.058, 0.032)  | 0.8  | -0.006<br>(-0.040, 0.028)  | 0.9  | -0.010<br>(-0.047, 0.027)  | 0.8  | -0.003<br>(-0.044, 0.037)  | 1.0  | 0.009<br>(-0.024, 0.041)   | 0.8  |
| Sperm conc. (million/mL) <sup>b</sup>    | semen  | 0.188<br>(0.068, 0.308)    | 0.04 | 0.096<br>(-0.004, 0.197)   | 0.2  | 0.049<br>(-0.057, 0.156)   | 0.6  | 0.093<br>(0.001, 0.186)    | 0.2  | 0.098<br>(0.007, 0.189)    | 0.2  | 0.072<br>(-0.019, 0.164)   | 0.3  |
|                                          | serum  | 0.037<br>(-0.118, 0.192)   | 0.9  | -0.043<br>(-0.173, 0.087)  | 0.8  | -0.015<br>(-0.114, 0.083)  | 0.9  | -0.005<br>(-0.112, 0.102)  | 1.0  | -0.003<br>(-0.120, 0.115)  | 1.0  | -0.011<br>(-0.105, 0.082)  | 1.0  |
| Total sperm count (million) <sup>b</sup> | semen  | 0.234<br>(0.046, 0.423)    | 0.08 | 0.115<br>(-0.042, 0.271)   | 0.4  | 0.056<br>(-0.109, 0.220)   | 0.8  | 0.087<br>(-0.059, 0.232)   | 0.5  | 0.135<br>(-0.008, 0.278)   | 0.2  | 0.105<br>(-0.039, 0.249)   | 0.4  |
|                                          | serum  | 0.097<br>(-0.147, 0.341)   | 0.7  | -0.094<br>(-0.299, 0.110)  | 0.6  | -0.037<br>(-0.192, 0.118)  | 0.9  | -0.025<br>(-0.193, 0.143)  | 0.9  | -0.014<br>(-0.199, 0.170)  | 1.0  | -0.006<br>(-0.153, 0.141)  | 1.0  |
| Progressive motile (%)                   | semen  | -2.359<br>(-3.943, -0.775) | 0.04 | -1.979<br>(-3.274, -0.684) | 0.04 | -1.693<br>(-3.047, -0.339) | 0.08 | -1.857<br>(-3.091, -0.623) | 0.04 | -1.818<br>(-3.002, -0.633) | 0.04 | -1.870<br>(-3.080, -0.660) | 0.04 |
|                                          | serum  | -0.153<br>(-2.245, 1.938)  | 1.0  | -0.273<br>(-2.353, 1.806)  | 1.0  | 1.028<br>(-0.293, 2.350)   | 0.3  | 0.858<br>(-0.574, 2.290)   | 0.5  | 0.918<br>(-0.654, 2.490)   | 0.5  | 0.993<br>(-0.259, 2.244)   | 0.3  |
| VCL ( $\mu\text{m}/\text{sec}$ )         | semen  | -1.176<br>(-2.098, -0.254) | 0.07 | -0.798<br>(-1.554, -0.042) | 0.2  | -0.716<br>(-1.515, 0.083)  | 0.3  | -0.606<br>(-1.319, 0.106)  | 0.2  | -0.841<br>(-1.531, -0.151) | 0.09 | -0.727<br>(-1.433, -0.022) | 0.2  |
|                                          | serum  | 0.179<br>(-1.038, 1.396)   | 0.9  | 0.083<br>(-1.129, 1.295)   | 1.0  | 1.015<br>(-0.007, 2.036)   | 0.2  | 0.616<br>(-0.219, 1.450)   | 0.4  | 0.570<br>(-0.345, 1.485)   | 0.5  | 0.532<br>(-0.198, 1.261)   | 0.4  |
| VSL ( $\mu\text{m}/\text{sec}$ )         | semen  | -0.921<br>(-1.687, -0.115) | 0.09 | -0.682<br>(-1.316, -0.049) | 0.2  | -0.769<br>(-1.432, -0.106) | 0.1  | -0.782<br>(-1.376, -0.189) | 0.07 | -0.840<br>(-1.412, -0.267) | 0.04 | -0.779<br>(-1.364, -0.194) | 0.07 |

|                            |       |                           |      |                           |      |                           |      |                           |      |                           |      |                           |      |
|----------------------------|-------|---------------------------|------|---------------------------|------|---------------------------|------|---------------------------|------|---------------------------|------|---------------------------|------|
|                            | serum | 0.004<br>(-1.008, 1.015)  | 1.0  | -0.060<br>(-1.066, 0.946) | 1.0  | 0.521<br>(-0.116, 1.159)  | 0.3  | 0.412<br>(-0.280, 1.104)  | 0.5  | 0.520<br>(-0.238, 1.279)  | 0.4  | 0.522<br>(-0.083, 1.126)  | 0.3  |
| Morphologically normal (%) | semen | -0.064<br>(-0.306, 0.292) | 1.0  | -0.140<br>(-0.341, 0.062) | 0.4  | -0.155<br>(-0.368, 0.057) | 0.4  | -0.107<br>(-0.299, 0.084) | 0.5  | 0.000<br>(-0.186, 0.185)  | 1.0  | -0.020<br>(-0.209, 0.170) | 1.0  |
|                            | serum | -0.103<br>(-0.321, 0.289) | 0.5  | -0.045<br>(-0.318, 0.227) | 0.9  | -0.060<br>(-0.266, 0.146) | 0.8  | -0.093<br>(-0.316, 0.131) | 0.7  | -0.035<br>(-0.281, 0.211) | 0.9  | -0.015<br>(-0.211, 0.181) | 1.0  |
| DFI (%)                    | semen | 0.130<br>(0.057, 0.204)   | 0.03 | 0.112<br>(0.051, 0.172)   | 0.03 | 0.089<br>(0.025, 0.152)   | 0.05 | 0.052<br>(-0.006, 0.110)  | 0.3  | 0.090<br>(0.035, 0.145)   | 0.04 | 0.085<br>(0.029, 0.141)   | 0.04 |
|                            | serum | 0.047<br>(0.050, 0.144)   | 0.6  | -0.040<br>(-0.121, 0.041) | 0.6  | -0.028<br>(-0.089, 0.034) | 0.6  | -0.020<br>(-0.087, 0.047) | 0.8  | -0.023<br>(-0.096, 0.051) | 0.8  | -0.019<br>(-0.077, 0.039) | 0.8  |
| HDS (%)                    | semen | 0.006<br>(-0.062, 0.074)  | 1.0  | -0.018<br>(-0.074, 0.038) | 0.8  | 0.045<br>(-0.013, 0.104)  | 0.3  | 0.003<br>(-0.057, 0.063)  | 1.0  | 0.010<br>(-0.049, 0.069)  | 0.9  | -0.012<br>(-0.076, 0.051) | 0.9  |
|                            | serum | 0.056<br>(-0.036, 0.147)  | 0.5  | 0.128<br>(0.049, 0.207)   | 0.04 | 0.037<br>(-0.023, 0.096)  | 0.5  | 0.098<br>(0.026, 0.170)   | 0.06 | 0.047<br>(-0.036, 0.131)  | 0.5  | 0.086<br>(0.019, 0.154)   | 0.07 |

For each outcome, the estimates for semen PFAS levels are shown on the first row and those for serum PFASs levels are shown on the second row. Other covariates included in the regression models were age, BMI, BMI<sup>2</sup>, smoking, alcohol intake, and abstinence time. Censored likelihood multiple imputation was used when seminal PFAS levels were below LOQ. *P*-values were false discovery rate (FDR)-adjusted to reduce overall testing error rate. VCL, curvilinear velocity; VSL, straight-line velocity; DFI, DNA fragmentation index; HDS, high DNA stainability.

<sup>a</sup> Semen volume, DFI, and HDS were ln transformed, sperm concentration and total sperm count were cubic-root transformed, other parameters were not transformed. <sup>b</sup> Subjects reporting spillage during semen collection (*n* = 21) were excluded from these analyses.

Table S7. Regression coefficients (95% confidence intervals) in semen quality parameters across semen-based PFAS quartiles ( $n = 664$ ).

| Outcome <sup>a</sup>                     |                 | PFOA                 | PFNA                 | PFDA                | PFUnDA               | PFOS                 | 6:2 Cl-PFESA         |
|------------------------------------------|-----------------|----------------------|----------------------|---------------------|----------------------|----------------------|----------------------|
| Semen volume (mL) <sup>b</sup>           | Q1              | Ref                  | Ref                  | Ref                 | Ref                  | Ref                  | Ref                  |
|                                          | Q2              | -0.04 (-0.11, 0.04)  | -0.07 (-0.14, 0.01)  | 0.03 (-0.05, 0.11)  | 0.00 (-0.08, 0.07)   | 0.03 (-0.05, 0.11)   | 0.01 (-0.06, 0.09)   |
|                                          | Q3              | -0.10 (-0.17, -0.02) | -0.08 (-0.16, 0.00)  | -0.08 (-0.16, 0.00) | -0.07 (-0.15, 0.01)  | -0.04 (-0.12, 0.04)  | -0.06 (-0.14, 0.02)  |
|                                          | Q4              | -0.06 (-0.14, 0.02)  | -0.06 (-0.14, 0.03)  | -0.01 (-0.09, 0.07) | -0.07 (-0.16, 0.01)  | -0.02 (-0.10, 0.07)  | 0.01 (-0.07, 0.09)   |
|                                          | <i>p</i> -Trend | 0.4                  | 0.5                  | 0.6                 | 0.1                  | 0.6                  | 0.9                  |
| Sperm conc. (million/mL) <sup>b</sup>    | Q1              | Ref                  | Ref                  | Ref                 | Ref                  | Ref                  | Ref                  |
|                                          | Q2              | 0.30 (0.08, 0.52)    | -0.02 (-0.24, 0.20)  | 0.05 (-0.18, 0.27)  | -0.05 (-0.27, 0.18)  | 0.03 (-0.20, 0.25)   | -0.01 (-0.24, 0.21)  |
|                                          | Q3              | 0.06 (-0.16, 0.28)   | 0.05 (-0.18, 0.28)   | 0.20 (-0.03, 0.43)  | 0.11 (-0.12, 0.33)   | 0.19 (-0.05, 0.42)   | 0.06 (-0.18, 0.29)   |
|                                          | Q4              | 0.36 (0.13, 0.59)    | 0.16 (-0.07, 0.40)   | 0.04 (-0.20, 0.28)  | 0.17 (-0.07, 0.40)   | 0.17 (-0.07, 0.41)   | 0.14 (-0.10, 0.37)   |
|                                          | <i>p</i> -Trend | 0.1                  | 0.3                  | 0.9                 | 0.2                  | 0.4                  | 0.4                  |
| Total sperm count (million) <sup>b</sup> | Q1              | Ref                  | Ref                  | Ref                 | Ref                  | Ref                  | Ref                  |
|                                          | Q2              | 0.37 (0.02, 0.71)    | -0.15 (-0.50, 0.20)  | 0.13 (-0.23, 0.49)  | -0.06 (-0.41, 0.29)  | 0.10 (-0.25, 0.46)   | 0.00 (-0.35, 0.36)   |
|                                          | Q3              | -0.08 (-0.43, 0.27)  | -0.07 (-0.43, 0.29)  | 0.18 (-0.18, 0.54)  | 0.05 (-0.31, 0.40)   | 0.20 (-0.16, 0.57)   | -0.02 (-0.39, 0.34)  |
|                                          | Q4              | 0.42 (0.06, 0.78)    | 0.15 (-0.22, 0.52)   | 0.05 (-0.33, 0.42)  | 0.13 (-0.24, 0.51)   | 0.23 (-0.15, 0.61)   | 0.21 (-0.16, 0.58)   |
|                                          | <i>p</i> -Trend | 0.2                  | 0.4                  | 1.0                 | 0.5                  | 0.5                  | 0.4                  |
| Progressive motile (%)                   | Q1              | Ref                  | Ref                  | Ref                 | Ref                  | Ref                  | Ref                  |
|                                          | Q2              | 0.31 (-2.65, 3.27)   | 0.00 (-2.98, 2.99)   | -0.29 (-3.34, 2.76) | -1.60 (-4.61, 1.40)  | -2.30 (-5.27, 0.68)  | -1.37 (-4.39, 1.64)  |
|                                          | Q3              | -1.49 (-4.48, 1.50)  | -2.02 (-5.08, 1.03)  | -1.71 (-4.79, 1.36) | -2.78 (-5.78, 0.22)  | -1.53 (-4.61, 1.56)  | -3.06 (-6.17, 0.04)  |
|                                          | Q4              | -4.26 (-7.30, -1.22) | -4.13 (-7.30, -0.97) | -2.87 (-6.03, 0.29) | -4.80 (-7.96, -1.64) | -5.54 (-8.72, -2.36) | -3.94 (-7.04, -0.83) |
|                                          | <i>p</i> -Trend | 0.02                 | 0.03                 | 0.2                 | 0.03                 | 0.01                 | 0.1                  |
| VCL (μm/sec)                             | Q1              | Ref                  | Ref                  | Ref                 | Ref                  | Ref                  | Ref                  |
|                                          | Q2              | -1.65 (-3.38, 0.07)  | 0.87 (-0.86, 2.61)   | -1.22 (-2.99, 0.55) | 0.25 (-4.61, 1.40)   | -1.60 (-1.50, 2.01)  | 0.41 (-1.34, 2.16)   |
|                                          | Q3              | -1.61 (-3.35, 0.12)  | -0.52 (-2.30, 1.25)  | -1.23 (-3.02, 0.55) | -0.65 (-5.78, 0.22)  | -2.78 (-2.40, 1.10)  | -1.86 (-3.66, -0.06) |
|                                          | Q4              | -2.64 (-4.41, -0.87) | -1.48 (-3.33, 0.36)  | -1.01 (-2.84, 0.83) | -1.12 (-7.96, -1.64) | -4.80 (-2.97, -0.72) | -1.03 (-2.84, 0.77)  |

|                            |                 |                      |                     |                      |                      |                      |                     |
|----------------------------|-----------------|----------------------|---------------------|----------------------|----------------------|----------------------|---------------------|
|                            | <i>p</i> -Trend | 0.08                 | 0.1                 | 0.6                  | 0.3                  | 0.1                  | 0.4                 |
| VSL (µm/sec)               | Q1              | Ref                  | Ref                 | Ref                  | Ref                  | Ref                  | Ref                 |
|                            | Q2              | -1.68 (-3.11, -0.24) | 0.60 (-0.84, 2.04)  | -1.52 (-2.99, -0.05) | -0.04 (-1.50, 1.41)  | -1.00 (-2.44, 0.45)  | 0.15 (-1.30, 1.60)  |
|                            | Q3              | -0.87 (-2.32, 0.57)  | -0.34 (-1.82, 1.13) | -1.72 (-3.20, -0.25) | -1.21 (-2.66, 0.24)  | -1.40 (-2.89, 0.09)  | -1.49 (-2.99, 0.00) |
|                            | Q4              | -2.13 (-3.60, -0.66) | -1.37 (-2.89, 0.16) | -1.46 (-2.98, 0.07)  | -1.60 (-3.13, -0.07) | -2.06 (-3.60, -0.52) | -1.27 (-2.77, 0.22) |
|                            | <i>p</i> -Trend | 0.1                  | 0.1                 | 0.4                  | 0.1                  | 0.1                  | 0.2                 |
| Morphologically normal (%) | Q1              | Ref                  | Ref                 | Ref                  | Ref                  | Ref                  | Ref                 |
|                            | Q2              | 0.32 (-0.14, 0.78)   | 0.23 (-0.23, 0.69)  | 0.16 (-0.32, 0.63)   | -0.02 (-0.49, 0.45)  | 0.31 (-0.15, 0.78)   | 0.07 (-0.40, 0.54)  |
|                            | Q3              | 0.06 (-0.40, 0.53)   | -0.02 (-0.50, 0.45) | 0.03 (-0.44, 0.51)   | 0.08 (-0.39, 0.55)   | 0.13 (-0.35, 0.62)   | -0.36 (-0.84, 0.13) |
|                            | Q4              | -0.21 (-0.68, 0.27)  | -0.36 (-0.86, 0.13) | -0.31 (-0.80, 0.18)  | -0.24 (-0.73, 0.25)  | 0.03 (-0.46, 0.53)   | -0.15 (-0.63, 0.33) |
|                            | <i>p</i> -Trend | 0.3                  | 0.1                 | 0.2                  | 0.5                  | 0.8                  | 0.6                 |
| DFI (%)                    | Q1              | Ref                  | Ref                 | Ref                  | Ref                  | Ref                  | Ref                 |
|                            | Q2              | 0.05 (-0.09, 0.19)   | -0.08 (-0.22, 0.06) | 0.07 (-0.07, 0.22)   | 0.06 (-0.08, 0.20)   | 0.03 (-0.11, 0.17)   | 0.07 (-0.07, 0.21)  |
|                            | Q3              | 0.14 (0.00, 0.28)    | 0.06 (-0.08, 0.21)  | -0.02 (-0.16, 0.12)  | 0.04 (-0.10, 0.18)   | 0.08 (-0.07, 0.22)   | 0.14 (0.00, 0.29)   |
|                            | Q4              | 0.21 (0.07, 0.35)    | 0.19 (0.05, 0.34)   | 0.20 (0.06, 0.35)    | 0.16 (0.01, 0.30)    | 0.25 (0.10, 0.40)    | 0.17 (0.02, 0.31)   |
|                            | <i>p</i> -Trend | 0.03                 | 0.01                | 0.05                 | 0.1                  | 0.01                 | 0.1                 |
| HDS (%)                    | Q1              | Ref                  | Ref                 | Ref                  | Ref                  | Ref                  | Ref                 |
|                            | Q2              | 0.02 (-0.08, 0.11)   | -0.02 (-0.12, 0.07) | 0.04 (-0.06, 0.13)   | 0.06 (-0.04, 0.15)   | 0.00 (-0.09, 0.10)   | 0.10 (0.00, 0.19)   |
|                            | Q3              | 0.06 (-0.04, 0.15)   | 0.01 (-0.09, 0.10)  | 0.02 (-0.07, 0.12)   | 0.09 (0.00, 0.19)    | 0.04 (-0.06, 0.14)   | 0.14 (0.04, 0.23)   |
|                            | Q4              | 0.04 (-0.06, 0.14)   | 0.10 (0.00, 0.20)   | 0.14 (0.04, 0.24)    | 0.17 (0.07, 0.27)    | 0.08 (-0.02, 0.18)   | 0.14 (0.04, 0.23)   |
|                            | <i>p</i> -Trend | 0.6                  | 0.1                 | 0.04                 | 0.01                 | 0.2                  | 0.1                 |

Estimates calculated using linear regression models adjusted for age, BMI, BMI<sup>2</sup>, smoking, alcohol intake, and abstinence time. *P*-Trend was the false discovery rate (FDR)-adjusted *p*-value for linear trend across quartiles. See Figure 3 and Figure S1 for corresponding graphical forms. VCL, curvilinear velocity; VSL, straight-line velocity; DFI, DNA fragmentation index; HDS, high DNA stainability.

<sup>a</sup> Semen volume, DFI, and HDS were ln transformed, sperm concentration and total sperm count were cubic-root transformed, other parameters were not transformed.

<sup>b</sup> Subjects reporting spillage during semen collection (*n* = 21) were excluded from these analyses.

Table S8. Regression coefficients (95% confidence intervals) in semen quality parameters across serum-based PFAS quartiles ( $n = 664$ ).

| Outcome <sup>a</sup>                     |                 | PFOA                | PFNA                | PFDA                 | PFUnDA              | PFOS                | 6:2 Cl-PFESA         |
|------------------------------------------|-----------------|---------------------|---------------------|----------------------|---------------------|---------------------|----------------------|
| Semen volume (mL) <sup>b</sup>           | Q1              | Ref                 | Ref                 | Ref                  | Ref                 | Ref                 | Ref                  |
|                                          | Q2              | 0.05 (-0.03, 0.12)  | 0.04 (-0.03, 0.12)  | 0.04 (-0.04, 0.12)   | 0.03 (-0.04, 0.11)  | 0.02 (-0.06, 0.09)  | 0.04 (-0.04, 0.12)   |
|                                          | Q3              | 0.01 (-0.07, 0.08)  | -0.03 (-0.11, 0.05) | 0.02 (-0.05, 0.10)   | 0.05 (-0.03, 0.12)  | 0.06 (-0.02, 0.14)  | 0.02 (-0.06, 0.10)   |
|                                          | Q4              | 0.06 (-0.02, 0.14)  | 0.05 (-0.03, 0.13)  | 0.09 (0.01, 0.17)    | 0.04 (-0.04, 0.12)  | 0.05 (-0.03, 0.13)  | 0.10 (0.02, 0.18)    |
|                                          | <i>p</i> -Trend | 0.4                 | 0.5                 | 0.1                  | 0.6                 | 0.4                 | 0.1                  |
| Sperm conc. (million/mL) <sup>b</sup>    | Q1              | Ref                 | Ref                 | Ref                  | Ref                 | Ref                 | Ref                  |
|                                          | Q2              | -0.01 (-0.23, 0.21) | -0.08 (-0.30, 0.14) | -0.18 (-0.40, 0.05)  | -0.10 (-0.33, 0.12) | 0.22 (-0.01, 0.44)  | -0.21 (-0.43, 0.02)  |
|                                          | Q3              | -0.09 (-0.31, 0.13) | -0.06 (-0.29, 0.17) | 0.06 (-0.17, 0.28)   | 0.12 (-0.11, 0.34)  | -0.01 (-0.24, 0.22) | 0.02 (-0.21, 0.25)   |
|                                          | Q4              | 0.11 (-0.11, 0.34)  | -0.12 (-0.35, 0.11) | -0.28 (-0.51, -0.05) | -0.11 (-0.34, 0.13) | 0.01 (-0.22, 0.25)  | -0.25 (-0.48, -0.02) |
|                                          | <i>p</i> -Trend | 0.4                 | 0.5                 | 0.1                  | 0.7                 | 0.6                 | 0.2                  |
| Total sperm count (million) <sup>b</sup> | Q1              | Ref                 | Ref                 | Ref                  | Ref                 | Ref                 | Ref                  |
|                                          | Q2              | 0.05 (-0.30, 0.40)  | -0.06(-0.41, 0.29)  | -0.22(-0.57, 0.13)   | -0.11 (-0.46, 0.25) | 0.37 (0.01, 0.72)   | -0.26 (-0.61, 0.10)  |
|                                          | Q3              | -0.14 (-0.49, 0.21) | -0.14 (-0.50, 0.22) | 0.14 (-0.22, 0.49)   | 0.26 (-0.09, 0.62)  | 0.09 (-0.27, 0.46)  | 0.07 (-0.29, 0.43)   |
|                                          | Q4              | 0.27 (-0.08, 0.62)  | -0.10 (-0.47, 0.26) | -0.28 (-0.65, 0.08)  | -0.09 (-0.46, 0.28) | 0.10 (-0.27, 0.47)  | -0.21 (-0.57, 0.15)  |
|                                          | <i>p</i> -Trend | 0.3                 | 0.7                 | 0.4                  | 0.9                 | 0.9                 | 0.6                  |
| Progressive motile (%)                   | Q1              | Ref                 | Ref                 | Ref                  | Ref                 | Ref                 | Ref                  |
|                                          | Q2              | 0.62 (-2.34, 3.58)  | 1.49 (-1.49, 4.47)  | 0.86 (-2.15, 3.87)   | 0.23 (-2.80, 3.26)  | 1.50 (-1.54, 4.54)  | -0.26 (-0.61, 0.10)  |
|                                          | Q3              | 0.61 (-2.36, 3.58)  | -1.25 (-4.29, 1.79) | 1.41 (-1.63, 4.44)   | 0.47 (-2.57, 3.51)  | 0.63 (-2.50, 3.76)  | 0.07 (-0.29, 0.43)   |
|                                          | Q4              | -2.16 (-5.14, 0.82) | 1.06 (-2.03, 4.15)  | 1.16 (-1.94, 4.26)   | -0.13 (-3.27, 3.02) | 0.14 (-3.01, 3.29)  | -0.21 (-0.57, -0.15) |
|                                          | <i>p</i> -Trend | 0.2                 | 0.8                 | 0.7                  | 0.9                 | 0.9                 | 0.7                  |
| VCL (μm/sec)                             | Q1              | Ref                 | Ref                 | Ref                  | Ref                 | Ref                 | Ref                  |
|                                          | Q2              | 0.37 (-1.35, 2.10)  | 1.02 (-0.71, 2.75)  | 0.63 (-1.11, 2.38)   | 0.94 (-0.82, 2.70)  | 0.62 (-1.13, 2.38)  | 1.47 (-0.28, 3.22)   |
|                                          | Q3              | 0.54 (-1.19, 2.27)  | 0.55 (-1.22, 2.32)  | 1.40 (-0.36, 3.16)   | 0.89 (-0.87, 2.65)  | 2.49 (0.69, 4.30)   | 0.57(-1.19, 2.34)    |
|                                          | Q4              | -0.08 (-1.82, 1.66) | 0.59 (-1.21, 2.39)  | 1.95 (0.16, 3.75)    | 1.12 (-0.70, 2.94)  | 0.78 (-1.04, 2.61)  | 1.50 (-0.28, 3.28)   |

|                            |                 |                     |                     |                     |                      |                     |                     |
|----------------------------|-----------------|---------------------|---------------------|---------------------|----------------------|---------------------|---------------------|
|                            | <i>p</i> -Trend | 0.8                 | 0.8                 | 0.1                 | 0.5                  | 0.6                 | 0.4                 |
| VSL (μm/sec)               | Q1              | Ref                 | Ref                 | Ref                 | Ref                  | Ref                 | Ref                 |
|                            | Q2              | 0.71 (-0.72, -2.14) | 0.34 (-1.10, 1.78)  | 0.28 (-1.17, 1.73)  | 0.58 (-0.88, 2.04)   | 0.13(-1.34,1.60)    | 1.17 (-0.29, 2.62)  |
|                            | Q3              | 0.77 (-0.67, 2.20)  | 0.31 (-1.16, 1.78)  | 0.48 (-0.98, 1.94)  | -0.35 (-1.82, 1.11)  | 1.01 (-0.49, 2.52)  | 0.18 (-1.29, 1.64)  |
|                            | Q4              | -0.39 (-1.83, 1.05) | -0.03 (-1.52, 1.47) | 1.02 (-0.48, 2.51)  | 0.30 (-1.21, 1.81)   | 0.33 (-1.19, 1.85)  | 0.84 (-0.64, 2.32)  |
|                            | <i>p</i> -Trend | 0.5                 | 0.9                 | 0.4                 | 1.0                  | 0.8                 | 0.7                 |
| Morphologically normal (%) | Q1              | Ref                 | Ref                 | Ref                 | Ref                  | Ref                 | Ref                 |
|                            | Q2              | 0.03 (-0.43, 0.50)  | 0.14 (-0.32, 0.60)  | 0.08 (-0.39, 0.55)  | -0.09 (-0.56, 0.38)  | 0.12 (-0.36, 0.59)  | 0.13 (-0.33, 0.60)  |
|                            | Q3              | 0.00 (-0.46, 0.46)  | -0.18 (-0.66, 0.29) | 0.26 (-0.21, 0.73)  | 0.08 (-0.40, 0.55)   | -0.07 (-0.56, 0.41) | -0.02 (-0.49, 0.46) |
|                            | Q4              | -0.25 (-0.71, 0.21) | -0.38 (-0.86, 0.10) | -0.20 (-0.68, 0.28) | -0.25 (-0.74, 0.24)  | -0.12 (-0.61, 0.37) | -0.23 (-0.70, 0.25) |
|                            | <i>p</i> -Trend | 0.4                 | 0.2                 | 0.5                 | 0.5                  | 0.6                 | 0.4                 |
| DFI (%)                    | Q1              | Ref                 | Ref                 | Ref                 | Ref                  | Ref                 | Ref                 |
|                            | Q2              | 0.06 (-0.08, 0.20)  | -0.04 (-0.18, 0.10) | 0.00 (-0.14, 0.14)  | -0.03 (-0.17, 0.12)  | -0.03 (-0.17, 0.11) | -0.02 (-0.16, 0.12) |
|                            | Q3              | -0.02 (-0.16, 0.11) | -0.06 (-0.20, 0.09) | -0.11 (-0.25, 0.03) | -0.15 (-0.29, -0.01) | 0.05 (-0.09, 0.20)  | 0.04 (-0.11, 0.18)  |
|                            | Q4              | 0.07 (-0.07, 0.21)  | -0.03 (-0.17, 0.11) | -0.04 (-0.19, 0.10) | -0.02 (-0.16, 0.13)  | 0.07 (-0.08, 0.22)  | 0.01 (-0.13, 0.16)  |
|                            | <i>p</i> -Trend | 0.6                 | 0.9                 | 0.6                 | 0.9                  | 0.4                 | 0.8                 |
| HDS (%)                    | Q1              | Ref                 | Ref                 | Ref                 | Ref                  | Ref                 | Ref                 |
|                            | Q2              | 0.06 (-0.03, 0.16)  | 0.03 (-0.06, -0.12) | 0.07 (-0.02, 0.16)  | 0.08 (-0.01, 0.18)   | 0.07 (-0.02, 0.17)  | 0.11 (0.01, 0.20)   |
|                            | Q3              | 0.08 (-0.01, 0.18)  | 0.08 (-0.01, 0.18)  | 0.04 (-0.05, 0.14)  | 0.07 (-0.02, 0.17)   | 0.08 (-0.02, 0.18)  | 0.12 (0.03, 0.22)   |
|                            | Q4              | 0.08 (-0.01, 0.18)  | 0.17 (0.07, 0.27)   | 0.17 (0.07, 0.27)   | 0.18 (0.08, 0.28)    | 0.13 (0.03, 0.22)   | 0.18 (0.09, 0.28)   |
|                            | <i>p</i> -Trend | 0.3                 | 0.01                | 0.01                | 0.01                 | 0.1                 | 0.01                |

Estimates calculated using linear regression models adjusted for age, BMI, BMI<sup>2</sup>, smoking, alcohol intake, and abstinence time. *P*-Trend was the false discovery rate (FDR)-adjusted *p*-value for linear trend across quartiles. See Figure 3 and Figure S1 for corresponding graphical forms. VCL, curvilinear velocity; VSL, straight-line velocity; DFI, DNA fragmentation index; HDS, high DNA stainability.

<sup>a</sup> Semen volume, DFI, and HDS were ln transformed, sperm concentration and total sperm count were cubic-root transformed, other parameters were not transformed.

<sup>b</sup> Subjects reporting spillage during semen collection (*n* = 21) were excluded from these analyses.



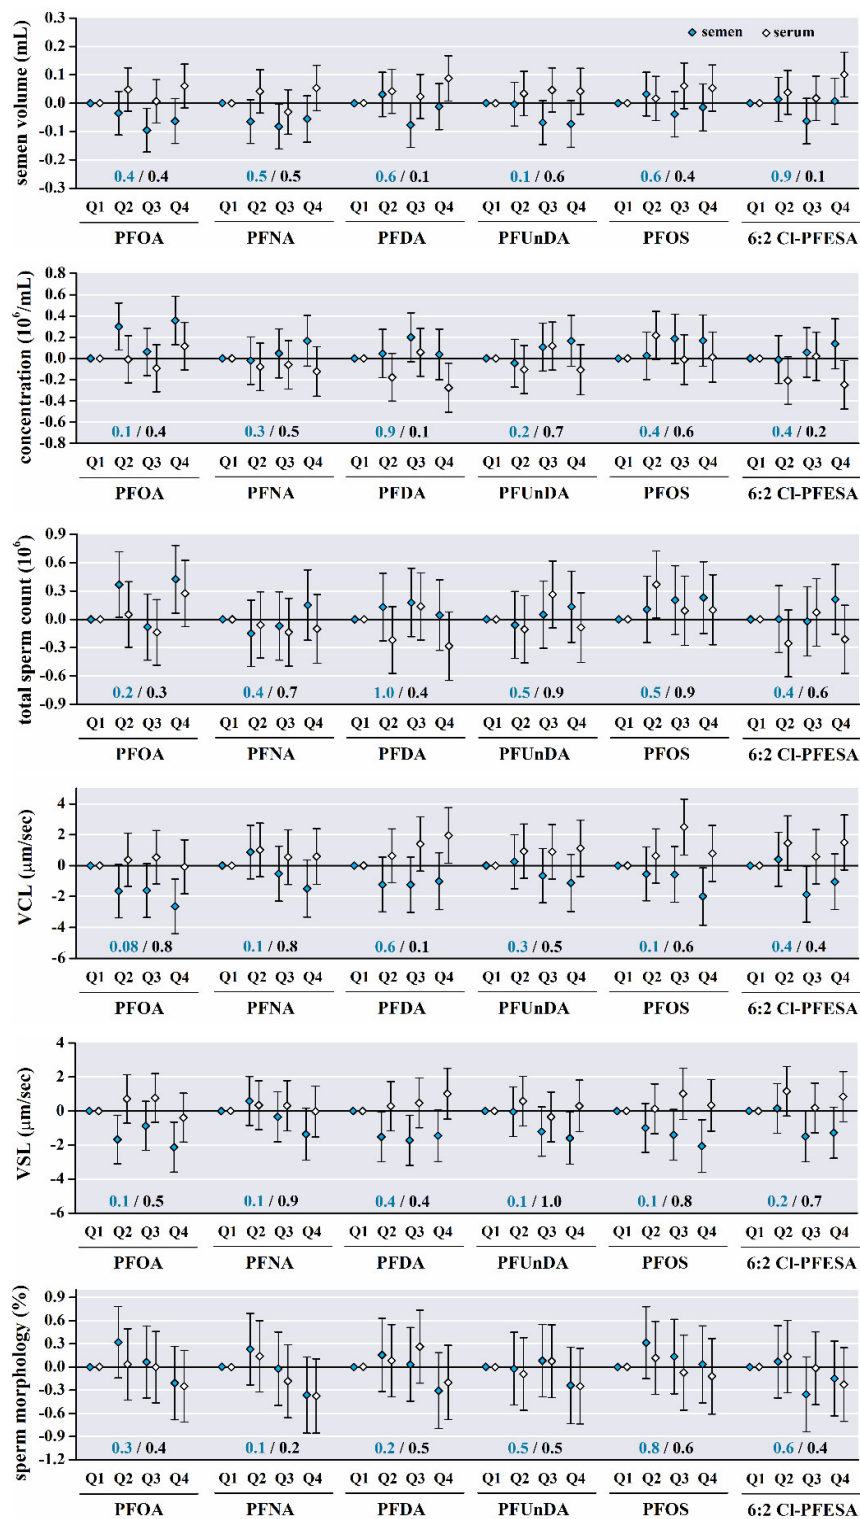

Figure S1 Regression coefficients and 95% confidence intervals for changes in semen parameters across PFAS quartiles ( $n = 664$ ). First quartile (Q1) was used as a reference group. Models were adjusted for age,

BMI, BMI<sup>2</sup>, smoking, alcohol intake, and abstinence time. Semen volume was ln-transformed, sperm concentration and total sperm count were cubic-root transformed. Curvilinear velocity (VCL), straight-line velocity (VSL), and sperm morphology were included in the regressions untransformed. FDR-adjusted *p*-values were used for trends and are shown in blue (semen PFAS quartiles) and black (serum PFAS quartiles). See Table S7 and S8 for corresponding numerical data.
