# Supplementary material
Source: PubMed Central journal article supplement (PMC6957285)
Supplement: ehp-127-127005-s002.pdf [file ehp-127-127005-s002.pdf]

**Note to readers with disabilities:** *EHP* strives to ensure that all journal content is accessible to all readers. However, some figures and Supplemental Material published in *EHP* articles may not conform to [508 standards](#) due to the complexity of the information being presented. If you need assistance accessing journal content, please contact [ehp508@niehs.nih.gov](mailto:ehp508@niehs.nih.gov). Our staff will work with you to assess and meet your accessibility needs within 3 working days.

### **Supplemental Material**

#### **Profiles of Emerging and Legacy Per-/Polyfluoroalkyl Substances in Matched Serum and Semen Samples: New Implications for Human Semen Quality**

Yitao Pan, Qianqian Cui, Jinghua Wang, Nan Sheng, Jun Jing, Bing Yao, and Jiayin Dai

#### **Table of Contents**

##### **Competing financial interests**

##### **Standards and reagents**

##### **Sample extraction**

##### **Instrument analysis**

**Table S1.** LC-MS/MS instrument parameters for the quantification of target analytes.

**Table S2.** Limits of quantitation (LOQs), matrix spike recoveries, and matrix effects (means  $\pm$  SD, %) of target PFASs ( $n = 5$ ).

**Table S3.** Pearson's correlations between ln-transformed PFAS concentrations in serum ( $n = 664$ ).

**Table S4.** Pearson's correlations between ln-transformed PFAS concentrations in semen ( $n = 664$ ).

**Table S5.** Estimated means (95% confidence intervals) for PFAS concentration ratios (semen versus serum) with and without imputation.

**Table S6.** Estimated changes in semen quality parameters associated with both semen- and serum-based PFAS levels ( $n = 664$ ).

**Table S7.** Regression coefficients (95% confidence intervals) in semen quality parameters across semen-based PFAS quartiles ( $n = 664$ ).

**Table S8.** Regression coefficients (95% confidence intervals) in semen quality parameters across serum-based PFAS quartiles ( $n = 664$ ).

**Figure S1.** Regression coefficients and 95% confidence intervals for changes in semen parameters across PFAS quartiles ( $n = 664$ ). First quartile (Q1) was used as a reference group. Models were adjusted for age, BMI, BMI<sup>2</sup>, smoking, alcohol intake, and abstinence time. Semen volume was ln-transformed, sperm concentration and total sperm count were cubic-root transformed. Curvilinear velocity (VCL), straight-line velocity (VSL), and sperm morphology were included in the regressions untransformed. FDR-adjusted  $p$ -values were used for trends and are shown in blue (semen PFAS quartiles) and black (serum PFAS quartiles). See Table S7 and S8 for corresponding numerical data.
